# Supplementary material for: Speg interactions that regulate the stability of excitation-contraction coupling protein complexes in triads and dyads
Source: PubMed Central journal article supplement (PMC10502019; doi:10.1038/s42003-023-05330-y), 2023-09-14

Figure 1a

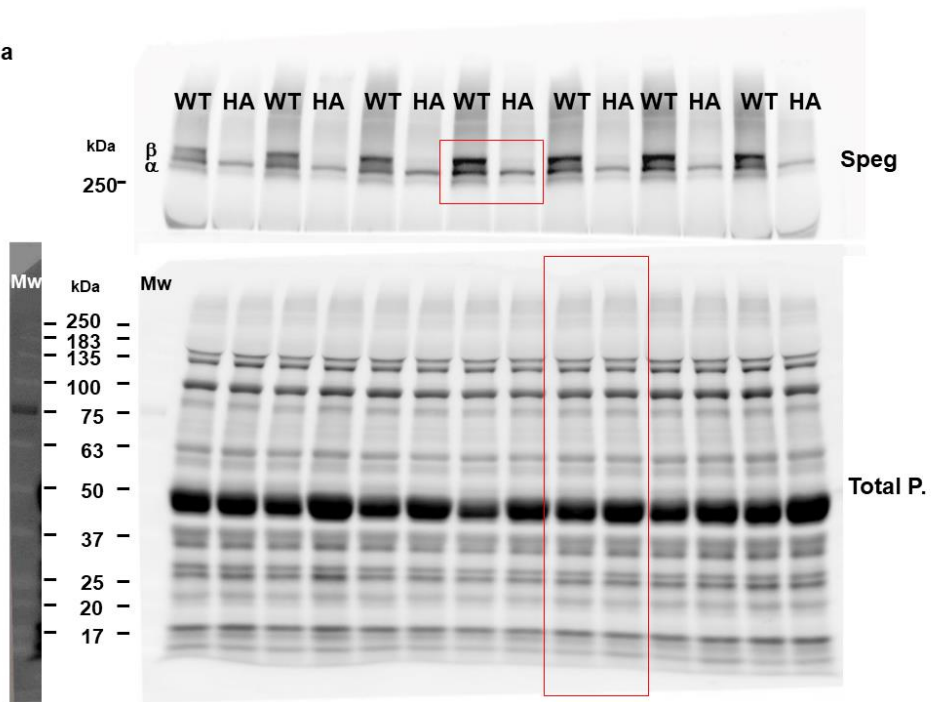

Figure 1b

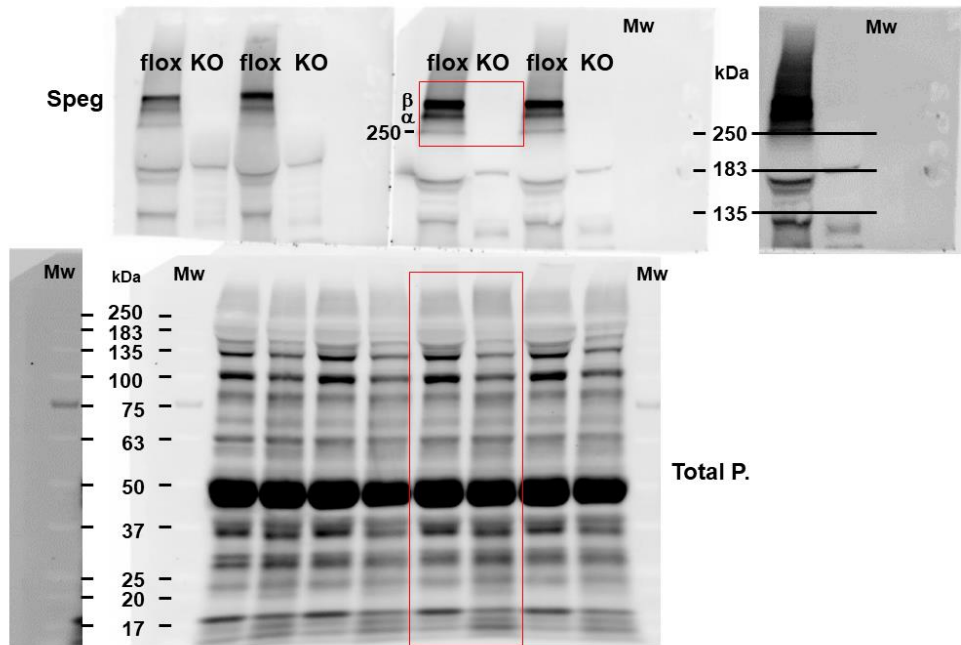

**Figure 1c**

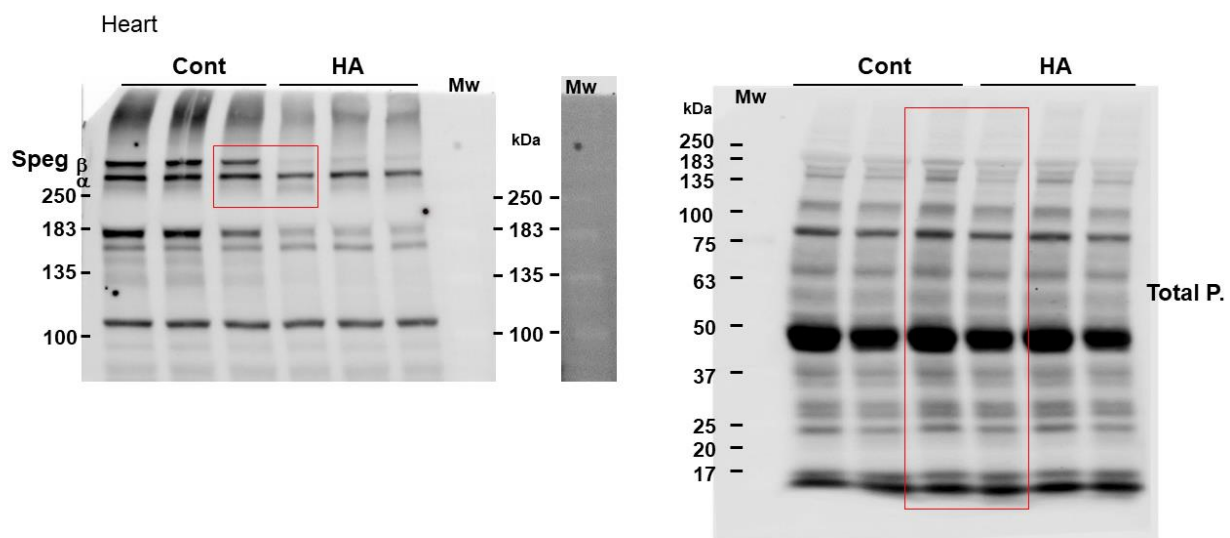

Figure 1d

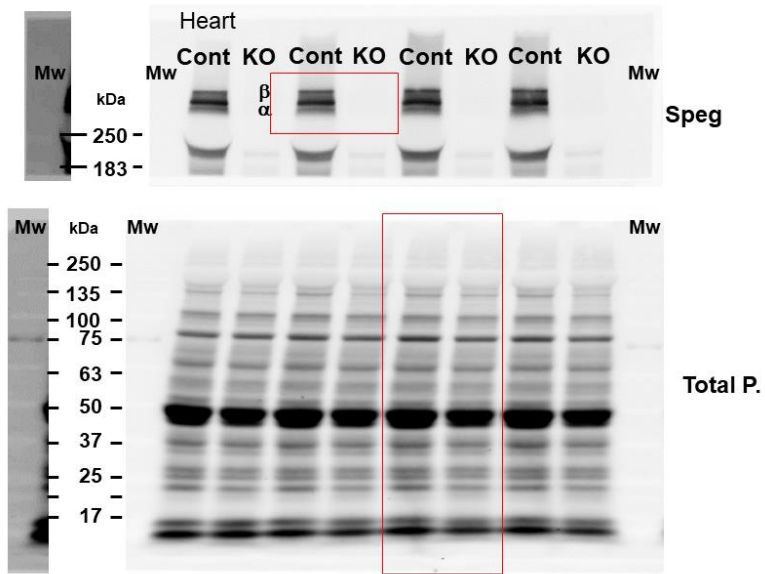

Figure 1g

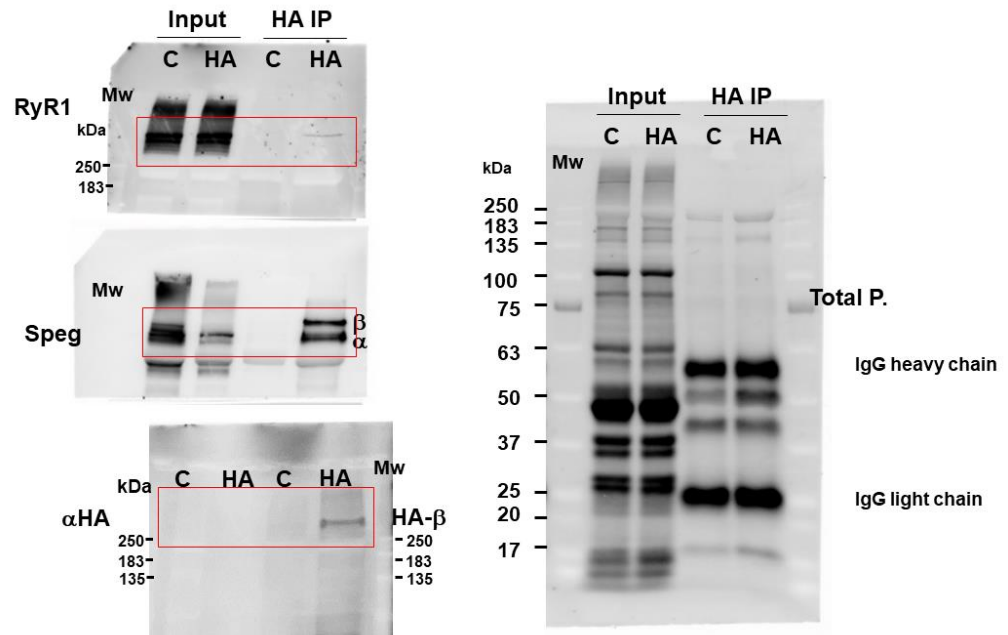

Figure 1h

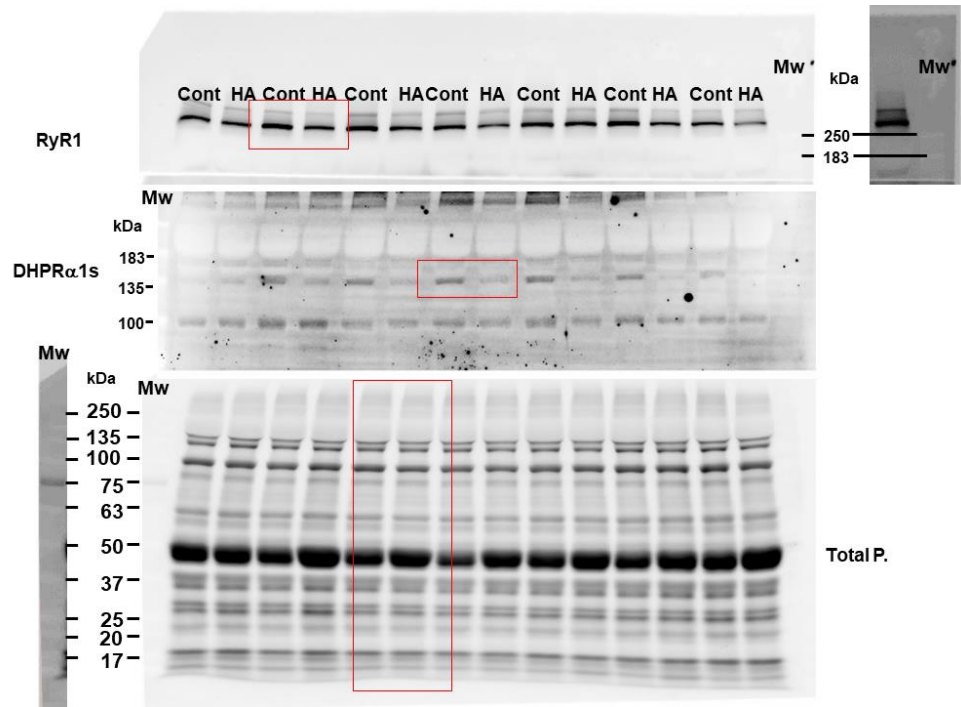

Figure 1i

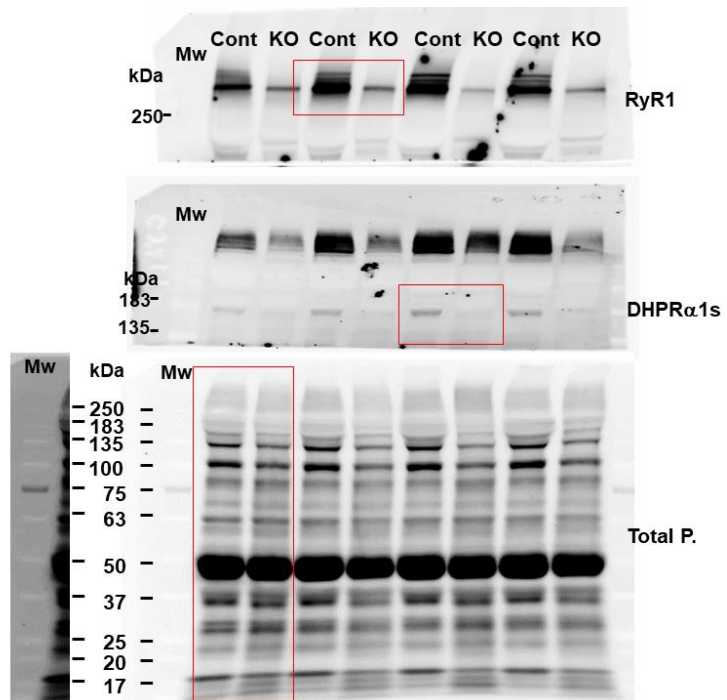





Figure 1k

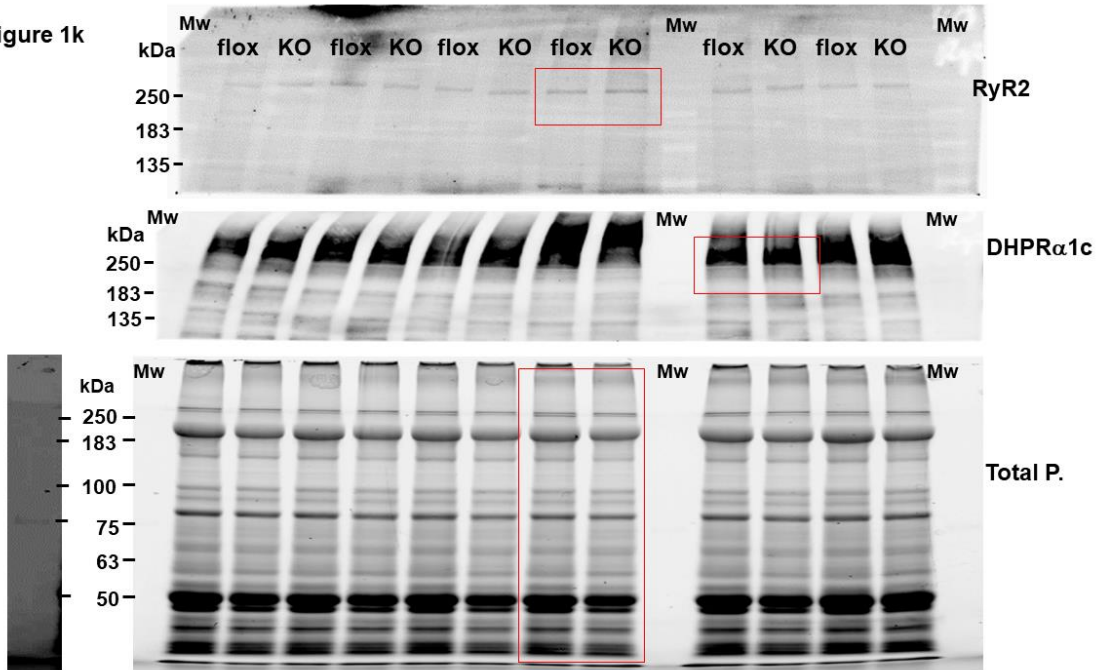

Figure 4a

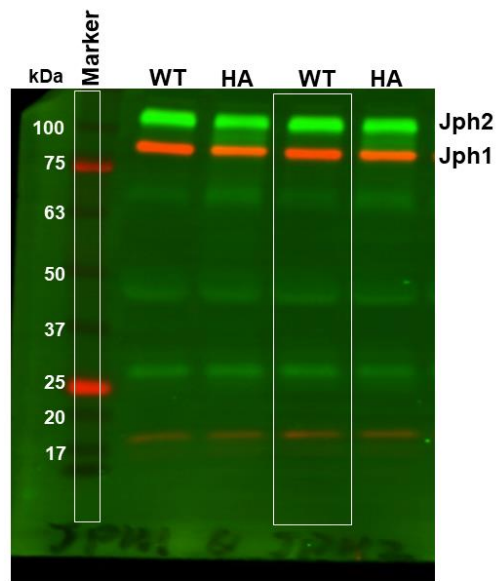

Figure 4b

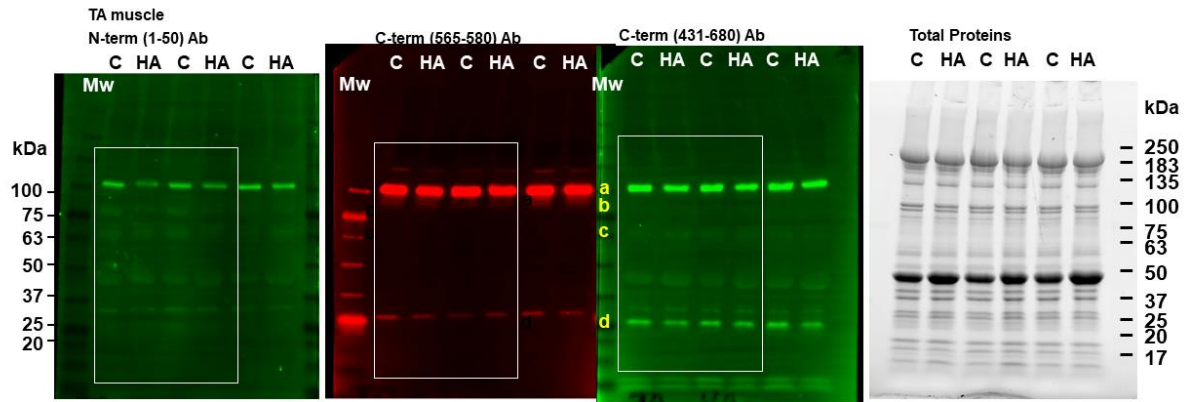

Figure 4d

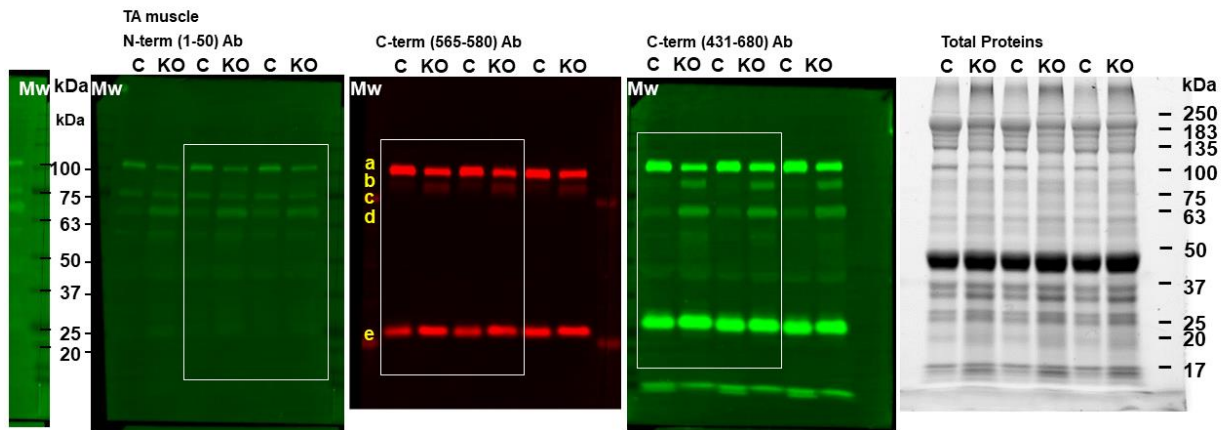

Figure 4f

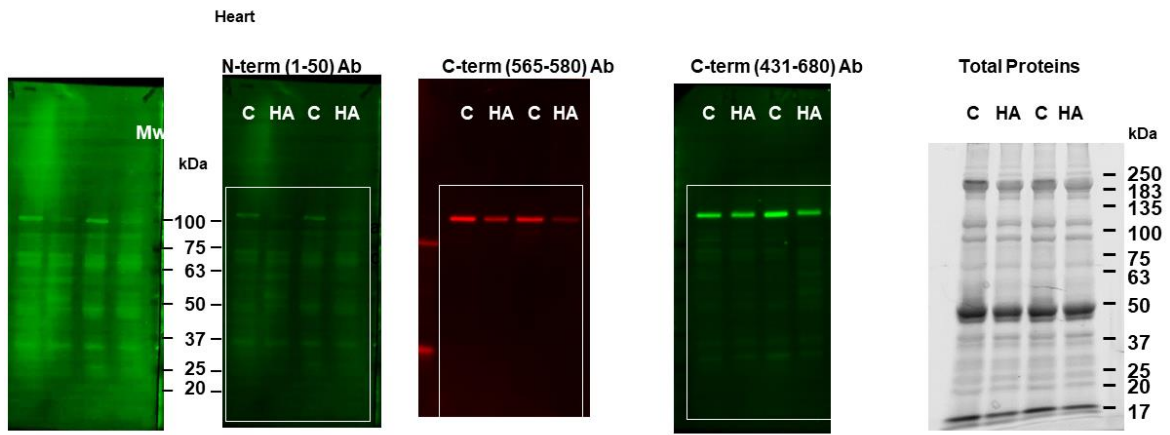

Figure 4h

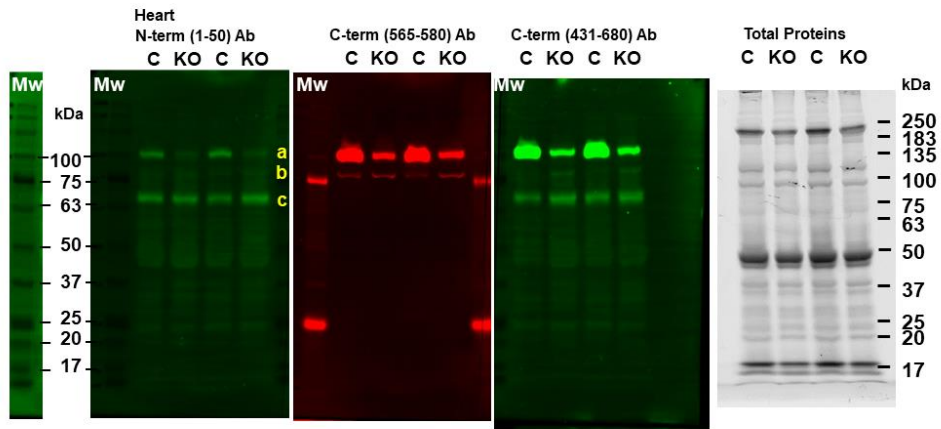

Supplemental Figure 5a

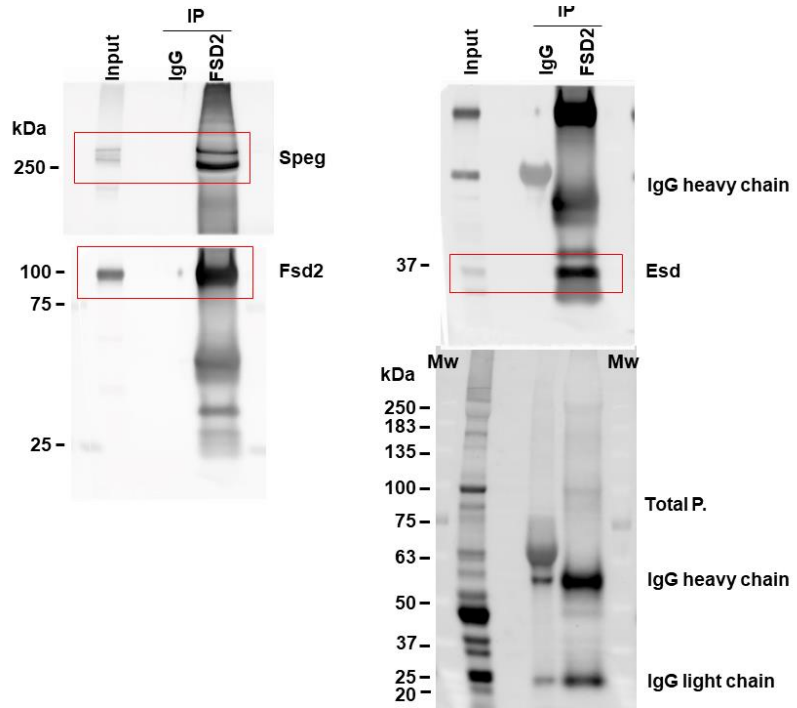

Supplemental Figure5b

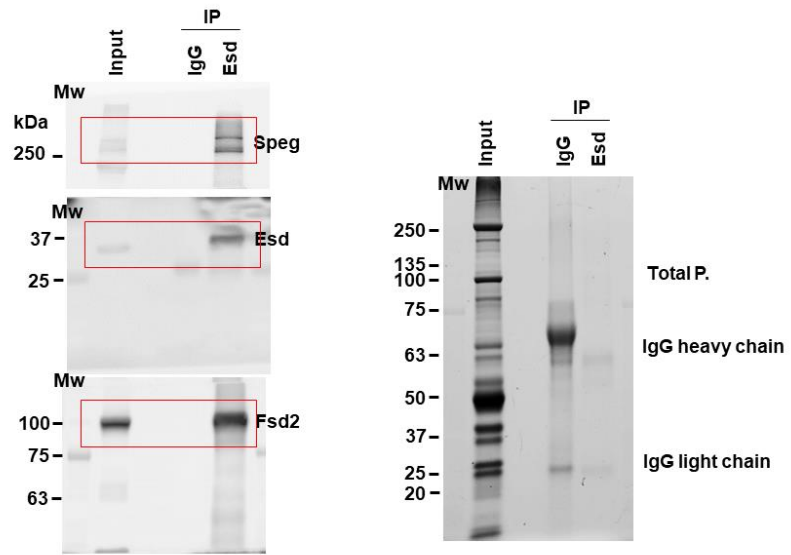



Figure 5d

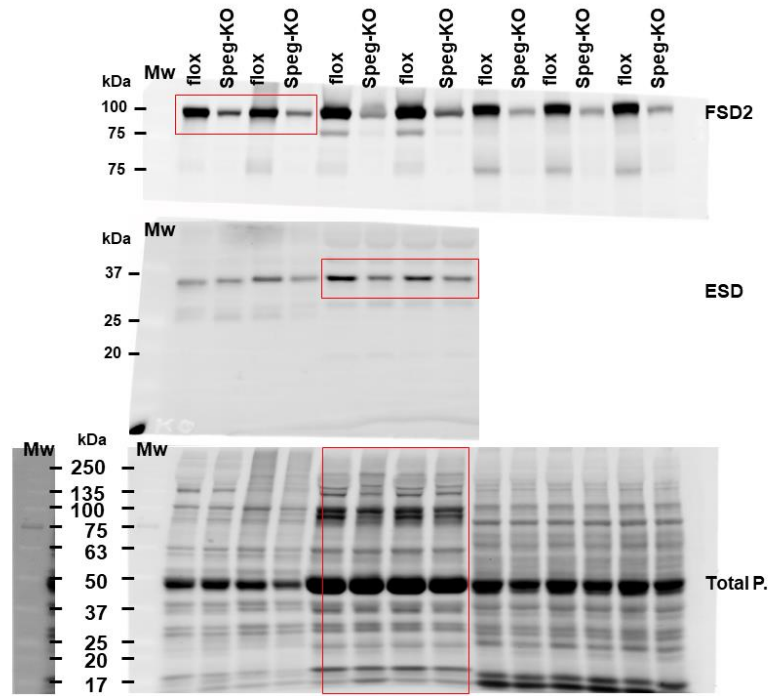

Figure 5e

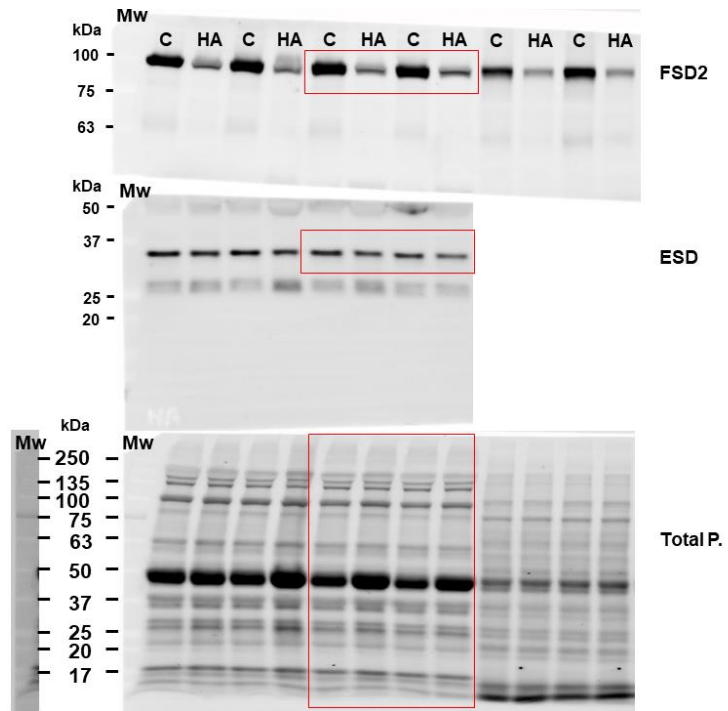

Figure 6b

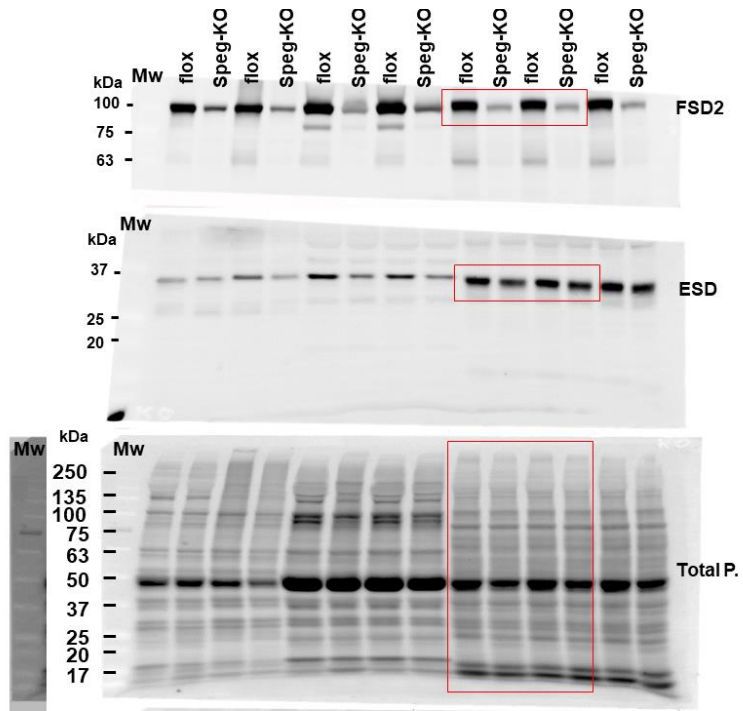

Figure 6c

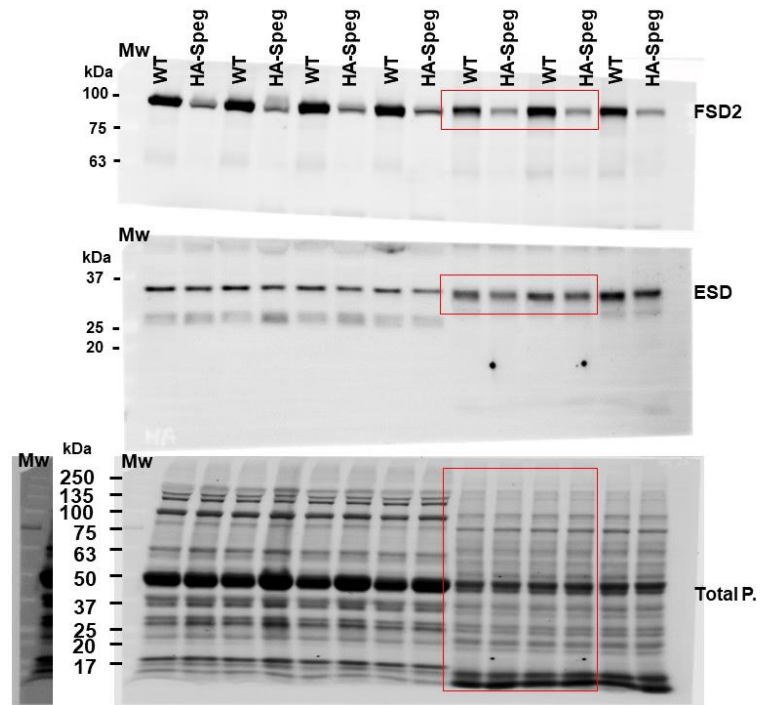

Supplement: 42003_2023_5330_MOESM7_ESM.pdf [file 42003_2023_5330_MOESM7_ESM.pdf]
