# Supplementary material for: Speg interactions that regulate the stability of excitation-contraction coupling protein complexes in triads and dyads
Source: PubMed Central journal article supplement (PMC10502019; doi:10.1038/s42003-023-05330-y), 2023-09-14
Supplement: 42003_2023_5330_MOESM2_ESM.pdf [file 42003_2023_5330_MOESM2_ESM.pdf]

## Supplementary Tables and Figures

| Supplementary Table 1 cardiac echo                   | n  | LVPWs mm             | LVPWd mm        | LVIDs mm         | LVIDd mm       | LVAWs mm         | LVAWd mm        | EF %            | FS %            |
|------------------------------------------------------|----|----------------------|-----------------|------------------|----------------|------------------|-----------------|-----------------|-----------------|
| WT male (13-14 weeks)                                | 6  | 1.30<br>±0.08        | 0.83<br>±0.06   | 2.13<br>±0.06    | 3.41<br>±0.04  | 1.48<br>±0.08    | 0.83<br>±0.06   | 68.2<br>±3.2    | 37.6<br>±2.3    |
| HA-Speg male (13-14 weeks)                           | 10 | 1.41<br>±0.10        | 1.04<br>±0.11   | 2.21<br>±0.07    | 3.28<br>±0.09  | 1.57<br>±0.09    | 1.0<br>2±0.08   | 64.6<br>±1.7    | 34.6<br>±1.3    |
| WT female (13-14Weeks)                               | 5  | 1.25<br>±0.09        | 0.8<br>4±0.07   | 2.03<br>±0.21    | 3.23<br>±0.08  | 1.23<br>±0.09    | 0.83<br>±0.06   | 57.9<br>±6.4    | 37.<br>3±5.0    |
| HA-Speg female (13-14weeks)                          | 4  | 1.16<br>±0.08        | 0.76<br>±0.06   | 2.02<br>±0.09    | 3.28<br>±0.09  | 1.25<br>±0.05    | 0.82<br>±0.06   | 69.1<br>±4.8    | 38.2<br>±3.7    |
| Control ( <i>Speg<sup>fl/fl</sup></i> ) (9-10 weeks) | 4  | 1.15<br>±0.07        | 0.80<br>±0.07   | 2.88<br>±0.05    | 4.11<br>±0.05  | 1.39<br>±0.08    | 0.91<br>±0.06   | 58.9<br>±3.6    | 31.0<br>±2.5    |
| Speg-KO male (9-10 weeks)                            | 4  | 0.83<br>±0.02*<br>*  | 0.76<br>±0.07   | 4.78<br>±0.94*   | 5.30<br>±0.82* | 0.8<br>1±0.09**  | 0.66<br>±0.09   | 24.4<br>±6.5**  | 11.4<br>±3.1**  |
| Control (9-10 weeks)                                 | 6  | 1.31<br>±0.04        | 0.99<br>±0.05   | 2.64<br>±0.11    | 3.78<br>±0.15  | 1.37<br>±0.04    | 0.91<br>±0.04   | 62.4<br>±1.2    | 33.2<br>±0.8    |
| Speg-KO female (9-10 weeks)                          | 5  | 0.79<br>±0.09*<br>** | 0.66<br>±0.07** | 3.59<br>±0.06*** | 4.2<br>0±0.10  | 0.84<br>±0.01*** | 0.64<br>±0.02** | 29.7<br>±3.5*** | 13.9<br>±1.8*** |

**Supplementary Table 1. Cardiac Echo values**

| <b>Supplementary Table 2<br/>Body composition</b>           | <b>n</b> | <b>Weight g</b> | <b>Length mm</b> | <b>Bone area cm<sup>2</sup></b> | <b>Fat weight g</b> | <b>Lean weight g</b> | <b>% Lean</b> | <b>%fat</b>  | <b>BMC g</b>     | <b>BMD mg/cm<sup>2</sup></b> |
|-------------------------------------------------------------|----------|-----------------|------------------|---------------------------------|---------------------|----------------------|---------------|--------------|------------------|------------------------------|
| WT male (10 weeks)                                          | 8        | 24.6<br>±0.7    | 97.6<br>±0.6     | 7.99<br>±0.14                   | 8.0<br>0±0.57       | 16.0<br>±0.4         | 65.4<br>±1.6  | 32.4<br>±1.6 | 0.55<br>±0.01    | 69.1<br>±1.2                 |
| HA-Speg male (10 weeks)                                     | 8        | 22.7<br>±0.4*   | 96.0<br>±0.4*    | 7.74<br>±0.09                   | 7.<br>6±0.28        | 14.7<br>±0.30*       | 64.5<br>±0.92 | 33.2<br>±0.9 | 0.5<br>2±0.02    | 67.1<br>±1.5                 |
| WT female (10 Weeks)                                        | 7        | 17.8<br>±0.6    | 93.5<br>±0.7     | 7.96<br>±0.20                   | 6.30<br>±0.33       | 11.5<br>±0.5         | 62.8<br>±1.4  | 34.4<br>±1.4 | 0.53<br>±0.02    | 66.1<br>±0.7                 |
| HA-Speg female (10 weeks)                                   | 7        | 18.1<br>±0.2    | 91.9<br>±0.1     | 7.56<br>±0.06                   | 6.03<br>±0.20       | 11.6<br>±0.2         | 64.1<br>±0.9  | 33.3<br>±0.9 | 0.47<br>±0.01    | 61.5<br>±0.6                 |
| Control male ( <i>Speg<sup>fl/fl</sup></i> ) (9-10 weeks)   | 7        | 23.8<br>±0.6    | 91.9<br>±0.5     | 7.75<br>±0.09                   | 7.22<br>±0.35       | 16.1<br>±0.6         | 62.7<br>±1.1  | 31.1<br>±1.5 | 0.51<br>±0.01    | 66.3<br>±1.6                 |
| Speg-KO male (9-10 weeks)                                   | 4        | 17.3<br>±0.4*** | 87.8<br>±0.7**   | 6.95<br>±0.14**                 | 5.44<br>±0.22*      | 11.5<br>±0.14***     | 61.4<br>±0.3  | 32.1<br>±0.6 | 0.37<br>±0.01*** | 52.8<br>±0.9***              |
| Control female ( <i>Speg<sup>fl/fl</sup></i> ) (9-10 weeks) | 4        | 19.1<br>±0.7    | 87.6<br>±0.2     | 7.38<br>±0.38                   | 5.11<br>±0.48       | 11.3<br>±0.3         | 59.4<br>±0.2  | 26.7<br>±0.2 | 0.42<br>±0.03    | 57.3<br>±1.8                 |
| Speg-KO female (9 weeks)                                    | 4        | 12.5<br>±0.9**  | 81.5<br>±2.5     | 6.67<br>±0.07                   | 3.52<br>±0.39*      | 7.00<br>±0.43***     | 56.1<br>±0.4  | 27.<br>9±1.4 | 0.34<br>±0.02    | 50.2<br>±2.5                 |

**Supplementary Table 2. Body Composition**

## Antibody list

| Antibody            | Supplier          | Catalog #  | Animal source  | Application                                     | Publication (PMID) / Validation                                     |
|---------------------|-------------------|------------|----------------|-------------------------------------------------|---------------------------------------------------------------------|
| Cav1.2 $\alpha$ 1   | Alomone labs      | ACC-003    | Rabbit         | Western blot (1:1,000)                          | 21408028;<br>37415128;<br>37128962                                  |
| Cav1.1 $\alpha$ 1   | Thermo Scientific | MA3-920    | Mouse          | Western blot (1:1,000)                          | 29368397;<br>28337975;<br>27669143                                  |
| HA-conjugated beads | Thermo Scientific | 88836      | Magnetic beads | IP (10 $\mu$ l/100 $\mu$ g lysates)             | 28666126;<br>21508667                                               |
| Jph1 (aa 559-572)   | ThermoFisher      | 40-5100    | Rabbit         | Western blot (1:1,000)                          | 29368397;<br>23148318;<br>26405035                                  |
| Jph2 (aa 1-50)      | Invitrogen        | MA5-32864  | Mouse          | Western blot (1:1,000)                          | Validated by WB in the mouse heart (By Invitrogen)                  |
| Jph2 (aa 565-580)   | Invitrogen        | 40-5300    | Rabbit         | WB (1:1,000)/IP (1 $\mu$ g/100 $\mu$ g lysates) | 34524407;<br>32697997;<br>30786093                                  |
| Jph2 (aa 431-680)   | Santa Cruz        | sc-377086  | Mouse          | Western blot (1:500)                            | 34401916;<br>31217359;<br>28740174                                  |
| RyRs                | DSHB              | 34C-c      | Mouse          | WB (1:500)/IP (1 $\mu$ g/100 $\mu$ g lysates)   | 33956073;<br>30147660;<br>32681036                                  |
| Speg                | Sino Biological   | 12472-T16  | Rabbit         | Western blot (1:1,000)                          | 33355670;<br>35763354;<br>37162921                                  |
| MyHC I              | DSHB              | BA-F8      | Mouse          | Fiber typing (1:200)                            | 33198807;<br>30866899;<br>21697544                                  |
| MyHC IIa            | DSHB              | SC-71      | Mouse          | Fiber typing (1:200)                            | 33198807;<br>30081940;<br>28982947                                  |
| MyHC IIb            | DSHB              | BF-F3      | Mouse          | Fiber typing (1:200)                            | 33198807;<br>30081940;<br>28982947                                  |
| Laminin             | abcam             | Ab11575    | Rabbit         | Fiber typing (membrane, 1:500)                  | 33198807;<br>32358797;<br>35665306                                  |
| Fsd2                | Proteintech       | 25609-1-AP | Rabbit         | WB (1:1000)/IP (1 $\mu$ g/100 $\mu$ g lysates)  | Validated by WB in the mouse heart (By Proteintech)                 |
| Esd                 | Invitrogen        | PA5-96537  | Rabbit         | Western blot (1:1000)                           | Validated by WB in the mouse kidney and cell lines (By Proteintech) |
| $\alpha$ HA         | Proteintech       | 66006-2-Ig | Mouse          | Western blot (1:1000)                           | 36179025;<br>33811247;<br>32951003                                  |

**Supplementary Table 3. Antibodies used**

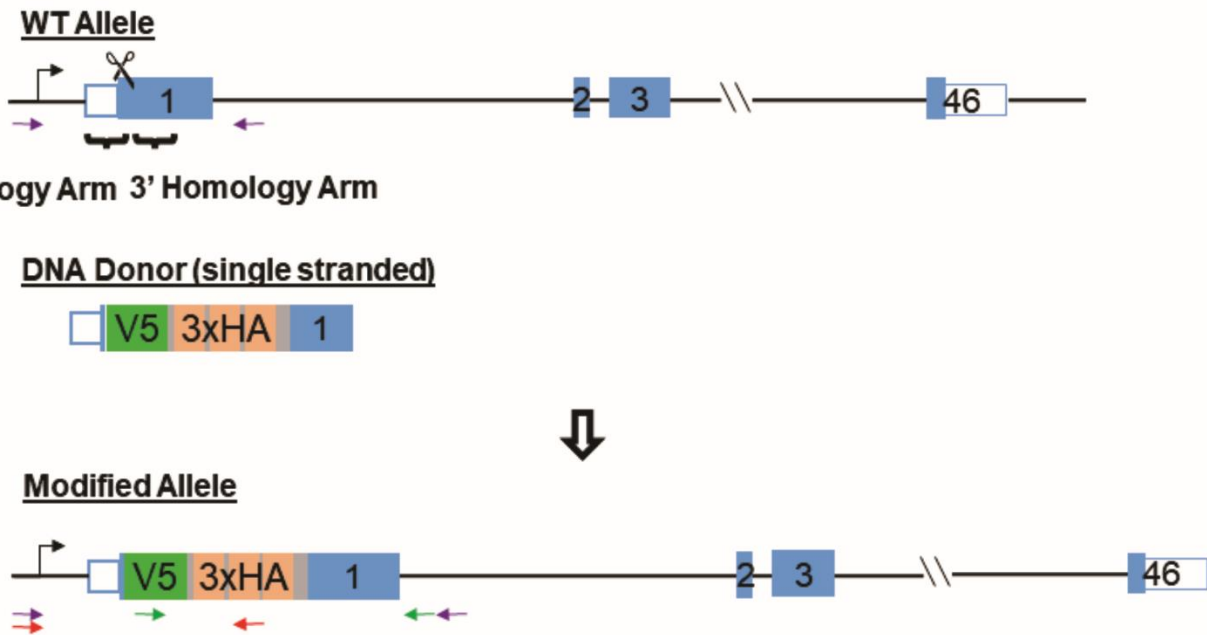

**Supplementary Fig. 1** Allele cartoon depicting CRISPR/Cas9-initiated design to target a V5-3xHA tag to the N-terminus of *Speg*. A guide RNA target was selected based on its proximity of the cut site to the ATG methionine codon to initiate translation. Homology arms approximately 45 nucleotides in length were selected flanking the break between the first and second amino acids. The V5 (green box) and HA (orange box) sequences were flanked by flexible G-S linker sequences (grey boxes). The modified allele was verified using standard PCR, with primers flanking the inserted sequence (purple) and internal to the targeted allele (5' red, 3' green).

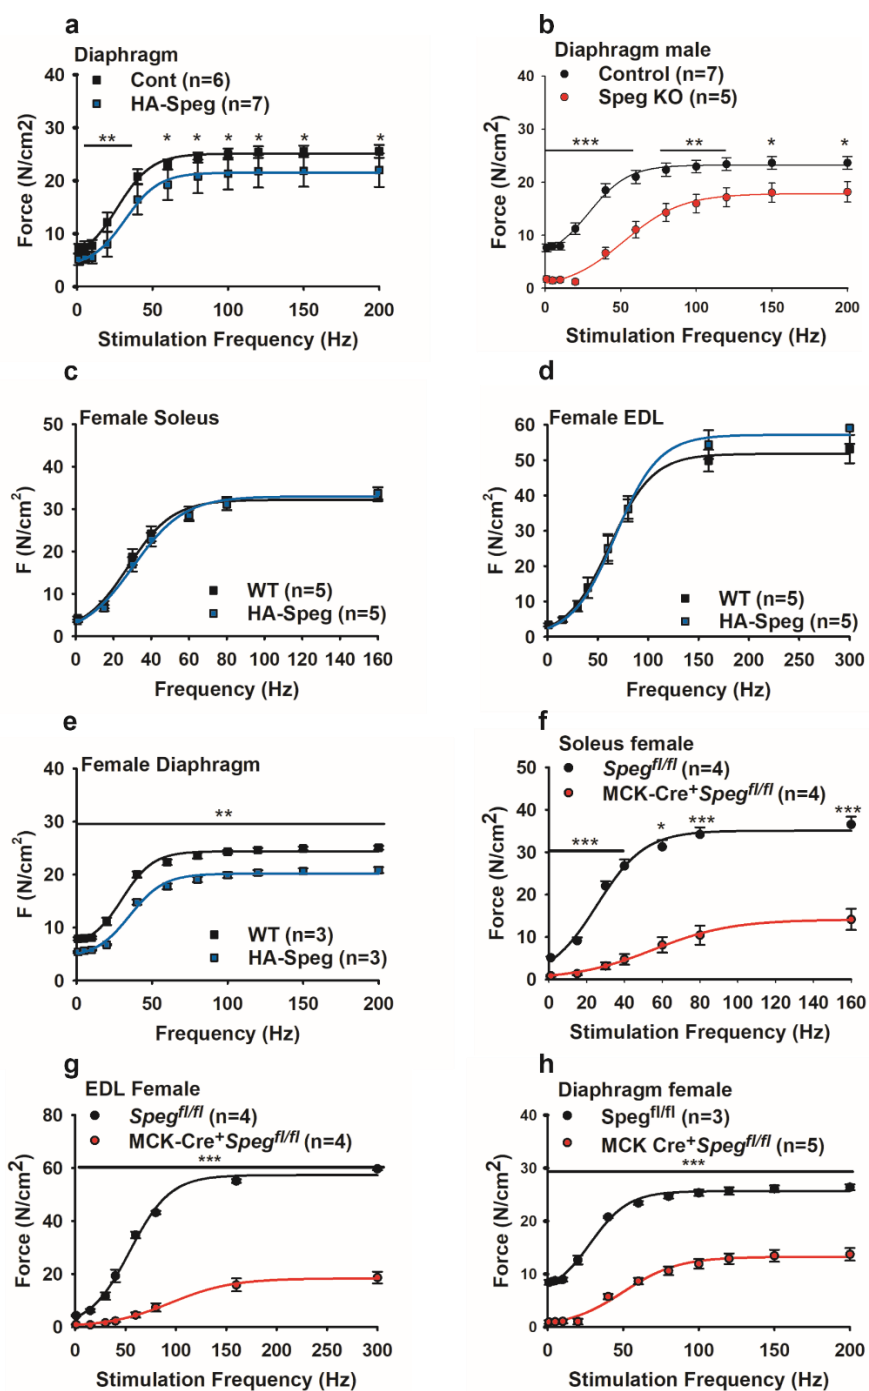

**Supplementary Figure 2. Force generation in HA-Speg, Speg KO and Control female mice.** Skeletal muscle function in HA-Speg (14 weeks), WT (13 weeks), Speg-KO (8-9 weeks) and *Speg<sup>fl/fl</sup>* (8-9 weeks) female mice were assessed using skeletal muscle force frequency measurements. The Speg-KO mice used were younger than the HA-Speg mice because they become extremely sick at around 10 weeks of age and often do not survive the echoes. Echoes on HA-Speg mice and age matched WT controls (13 weeks of age) were performed as described in Methods. **A.** Force Frequency data for WT and HA-Speg female soleus. **B.** Force Frequency data for female EDL from control and HA-Speg. **C.** Force Frequency data for WT and HA-Speg female diaphragm. **D.** Force Frequency data for Control and Speg KO female soleus. **E.** Force Frequency data for WT and Speg-KO female EDL. **F.** Force Frequency data for Control and Speg-KO female diaphragm. Data are plotted as mean  $\pm$  SEM. \*\*\* $P < 0.001$ , \*\* $P < 0.01$ , and \* $P < 0.05$ .

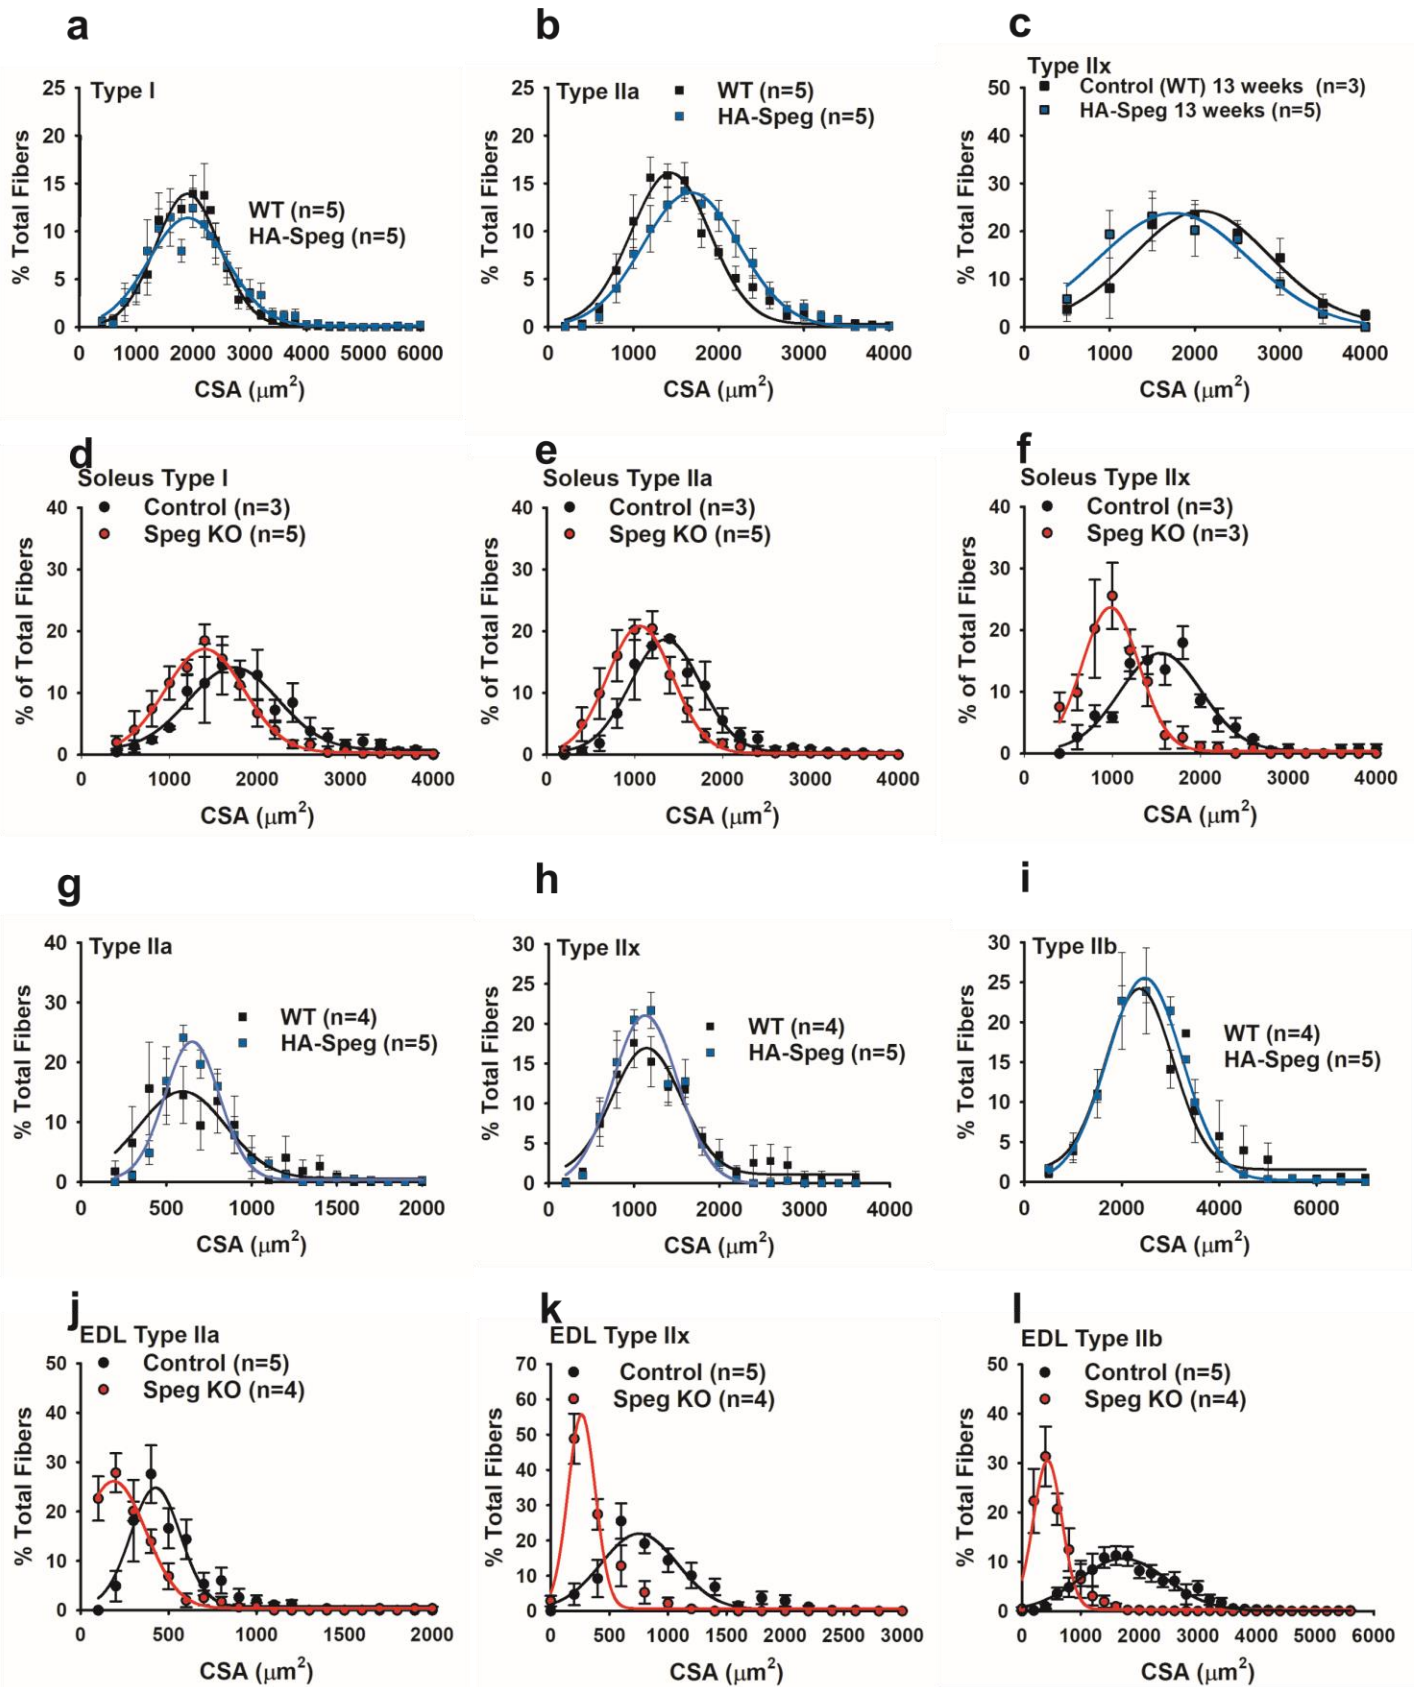

**Supplementary Figure 3. Effect of Speg deficiencies on the distribution of CSA of different fiber types.** Soleus and EDL muscle from WT (control), HA-Speg, Speg<sup>fl/fl</sup> (control) and Speg KO mice were prepared, labeled with fiber type specific antibodies and analyzed with MyoSight. **A-C** Binned CSA distributions of Type I, IIa and IIx fibers, respectively in soleus of HA-Speg. **D-F** Binned CSA distributions of Type I, IIa and IIx fibers, respectively in soleus of Speg KO. **G-H.** Binned CSA distributions of Type IIa, IIx and IIb fibers, respectively in

EDL of HA-Speg mice. **J-K.** Binned CSA distributions of Type IIa, IIx and IIb fibers, respectively in EDL of **Speg KO** mice.

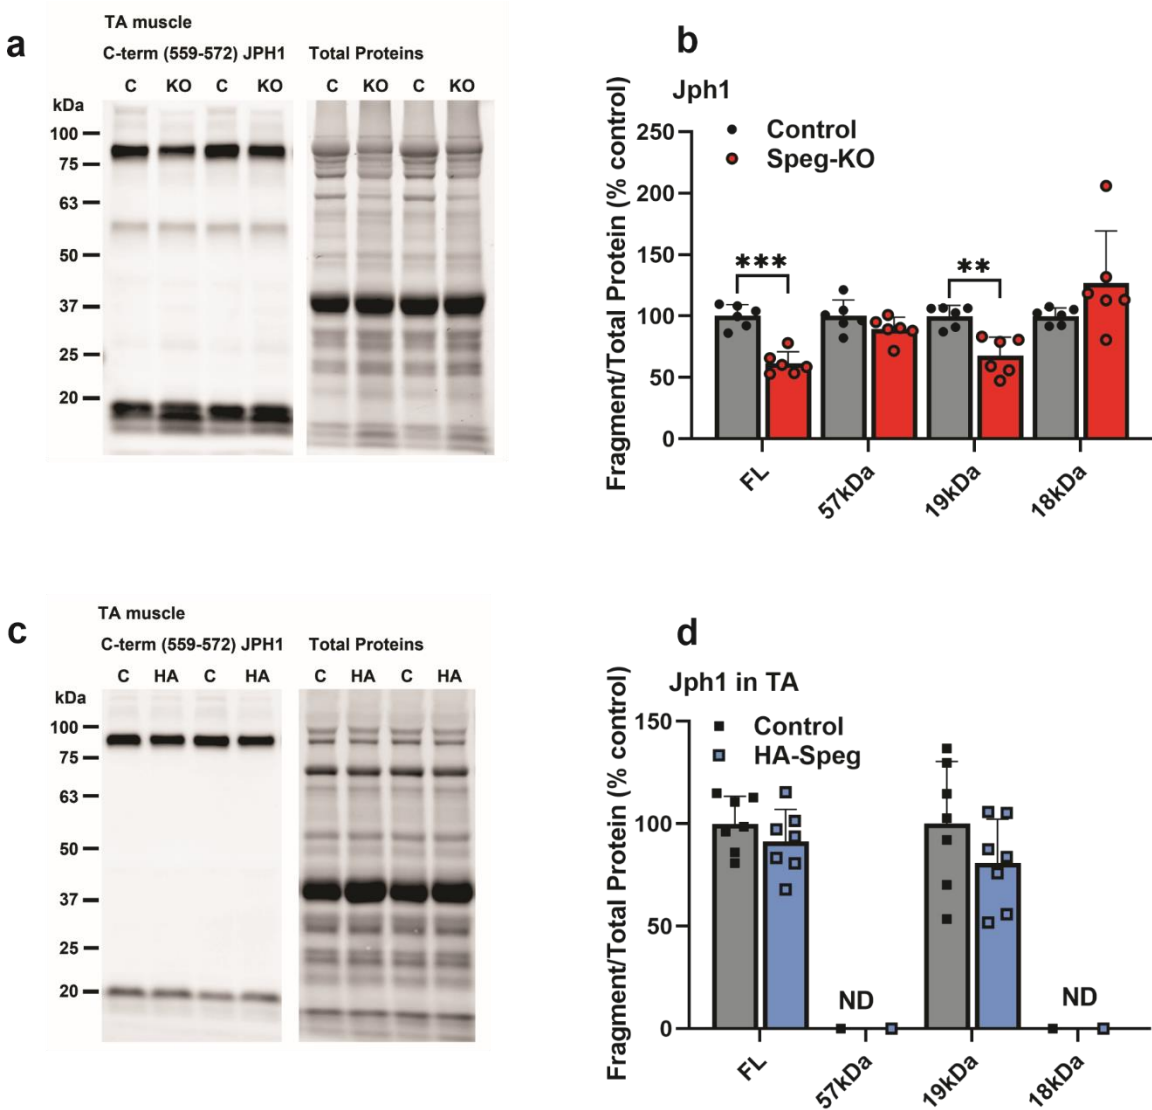

**Supplementary Figure 4. Jph1 fragmentation in Speg Deficient Mice. A.** Western blot in TA homogenates from control and Speg KO mice with an antibody to Jph1. Left panel western blot. Right panel protein. **B.** Quantitation of Fragments of Jph1 (C=6, KO n=6). **C** Western blot in TA homogenates from control and HA-Speg mice with an antibody to Jph1 (C=7, HA=7). Left panel western blot. Right panel protein. **D.** Quantitation of fragments of Jph1. Mean  $\pm$  SD. \*\*\*P<0.001, \*\*P<0.01, \*P<0.05

**A**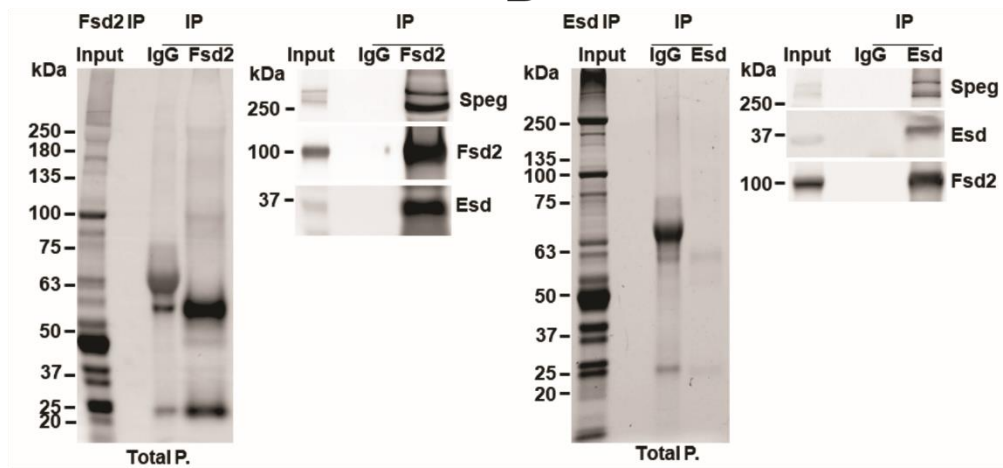

**Supplementary Figure 5. IPs of Fsd2 and Esd.** **A.** Immunoprecipitation of Fsd2 from gastrocnemius muscle of WT mice followed by western blotting with antibodies to Speg, Fsd2 and Esd. **B.** Immunoprecipitation of Esd from gastrocnemius muscle of WT mice followed by western blotting with antibodies to Speg, Fsd2 and Esd.



**A**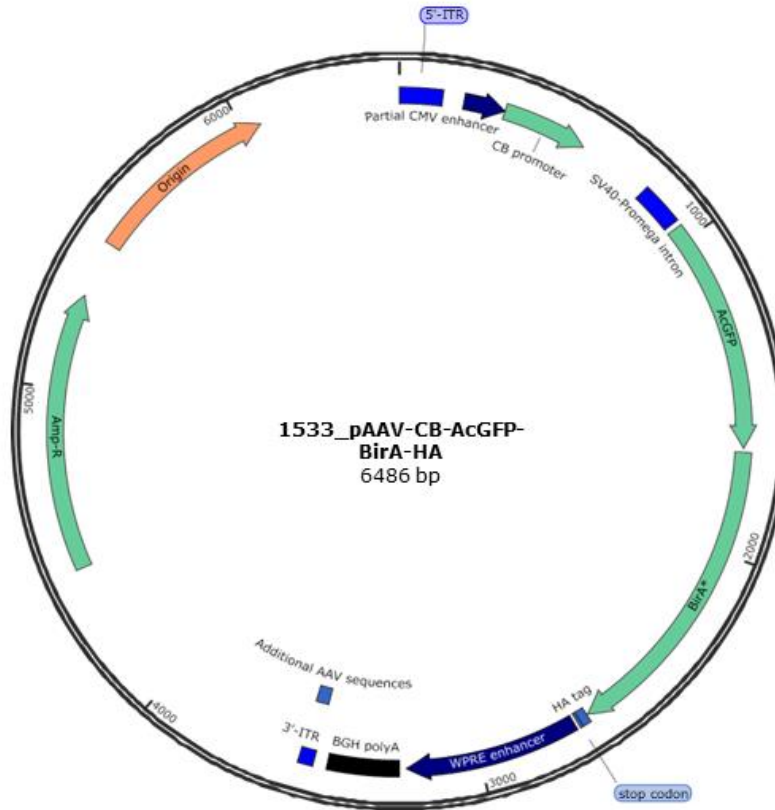**B**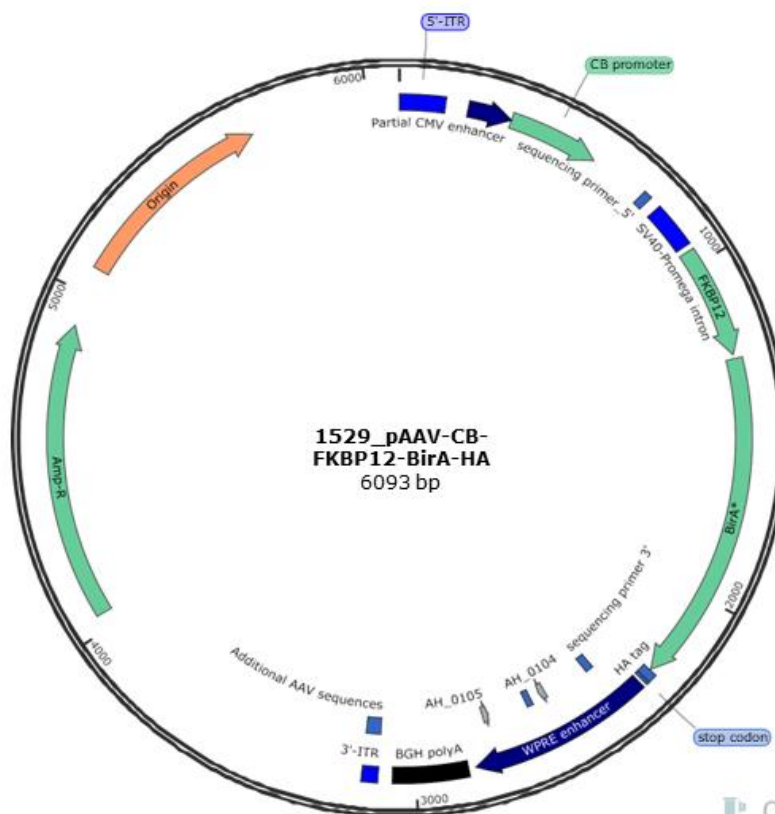

Created by SnapGene

**Supplementary Figure 6.** A. Plasmid “1533\_pAAV-CB-AcGFP-BirA-HA” which expresses an *Aequorea coerulea* GFP (AcGFP) with a Gly-Gly-Ser-Gly flexible linker fused to a C-terminal BirA\* biotin ligase followed by an Ala and a Hemagglutinin (HA) epitope tag. The transgene cassette is driven by a Chicken beta Actin promoter with a CMV enhancer element and includes a 3' woodchuck hepatitis virus posttranscriptional regulatory element (WPRE) and bovine growth hormone polyadenylation signal downstream. B. A plasmid in the identical configuration named “1529\_pAAV-CB-FKBP12-BirA-HA.”
