# Supplementary material for: Speg interactions that regulate the stability of excitation-contraction coupling protein complexes in triads and dyads
Source: PubMed Central journal article supplement (PMC10502019; doi:10.1038/s42003-023-05330-y), 2023-09-14
Supplement: 42003_2023_5330_MOESM3_ESM.pdf [file 42003_2023_5330_MOESM3_ESM.pdf]

## **Description of Additional Supplementary Files**

**File name:** Supplementary Data 1

**Description:** Proteomic datasets 1-12.

**File name:** Supplementary Data 2

**Description:** Source data for all manuscript figures.

**File name:** Supplementary Data 3

**Description:** Source data for Supplementary Tables and Figures.

**File name:** Supplementary Data 4

**Description:** Uncropped gels.
